# Supplementary material
Source: HighWire-hosted journal article supplement (https://cmaj.ca/highwire/filestream/149498/field_highwire_adjunct_files/2/221318-res-3-at.pdf)
Supplement: 221318-res-3-at.pdf [file 221318-res-3-at.pdf]

**eTable 3.** Monthly observed and expected rates per 100,000 and adjusted relative change (RR, 95% CI) in eating disorder-related emergency department visits and hospitalizations in Ontario during the pandemic era among adults age 27 to 105, by age.

|                | 27-40                       |               |                   |                  |               |                   | 41-105                      |               |                   |                  |               |                   |
|----------------|-----------------------------|---------------|-------------------|------------------|---------------|-------------------|-----------------------------|---------------|-------------------|------------------|---------------|-------------------|
|                | Emergency department visits |               |                   | Hospitalizations |               |                   | Emergency department visits |               |                   | Hospitalizations |               |                   |
|                | Observed rate               | Expected rate | RR (95% CI)       | Observed rate    | Expected rate | RR (95% CI)       | Observed rate               | Expected rate | RR (95% CI)       | Observed rate    | Expected rate | RR (95% CI)       |
| Overall        | 0.61                        | 0.57          | 1.07 (0.99, 1.15) | 0.66             | 0.72          | 0.92 (0.90, 0.94) | 0.14                        | 0.11          | 1.15 (1.07, 1.24) | 0.21             | 0.30          | 0.72 (0.64, 0.80) |
| March 2020     | 0.59                        | 0.59          | 1.01 (0.97, 1.05) | 0.42             | 0.75          | 0.56 (0.55, 0.56) | 0.08                        | 0.12          | 0.64 (0.61, 0.67) | 0.21             | 0.27          | 0.78 (0.73, 0.83) |
| April 2020     | 0.24                        | 0.59          | 0.42 (0.40, 0.43) | 0.45             | 0.75          | 0.60 (0.60, 0.61) | 0.09                        | 0.12          | 0.75 (0.72, 0.79) | 0.17             | 0.27          | 0.63 (0.59, 0.67) |
| May 2020       | 0.42                        | 0.58          | 0.71 (0.68, 0.75) | 0.76             | 0.75          | 1.02 (1.01, 1.03) | 0.08                        | 0.12          | 0.65 (0.62, 0.68) | 0.17             | 0.27          | 0.63 (0.58, 0.67) |
| June 2020      | 0.56                        | 0.58          | 0.95 (0.91, 1.00) | 0.62             | 0.74          | 0.84 (0.83, 0.85) | 0.23                        | 0.12          | 1.85 (1.76, 1.95) | 0.28             | 0.28          | 1.01 (0.94, 1.08) |
| July 2020      | 0.42                        | 0.58          | 0.71 (0.68, 0.75) | 0.49             | 0.74          | 0.65 (0.65, 0.66) | 0.16                        | 0.12          | 1.32 (1.25, 1.39) | 0.2              | 0.28          | 0.71 (0.66, 0.77) |
| August 2020    | 0.56                        | 0.58          | 0.95 (0.91, 1.01) | 0.83             | 0.74          | 1.12 (1.11, 1.14) | 0.24                        | 0.12          | 1.99 (1.88, 2.11) | 0.29             | 0.28          | 1.04 (0.96, 1.13) |
| September 2020 | 0.62                        | 0.58          | 1.07 (1.02, 1.14) | 0.56             | 0.74          | 0.75 (0.74, 0.76) | 0.12                        | 0.12          | 1.00 (0.95, 1.06) | 0.32             | 0.28          | 1.13 (1.04, 1.23) |
| October 2020   | 0.56                        | 0.58          | 0.96 (0.90, 1.01) | 0.52             | 0.74          | 0.71 (0.70, 0.71) | 0.16                        | 0.12          | 1.35 (1.27, 1.43) | 0.23             | 0.28          | 0.80 (0.73, 0.87) |
| November 2020  | 0.9                         | 0.58          | 1.56 (1.47, 1.65) | 0.62             | 0.74          | 0.85 (0.84, 0.86) | 0.08                        | 0.12          | 0.68 (0.64, 0.72) | 0.19             | 0.28          | 0.65 (0.60, 0.71) |
| December 2020  | 0.35                        | 0.58          | 0.60 (0.56, 0.64) | 0.87             | 0.74          | 1.18 (1.16, 1.20) | 0.11                        | 0.12          | 0.91 (0.85, 0.97) | 0.24             | 0.29          | 0.83 (0.76, 0.91) |
| January 2021   | 0.64                        | 0.58          | 1.10 (1.04, 1.18) | 1.0              | 0.73          | 1.37 (1.35, 1.39) | 0.14                        | 0.12          | 1.24 (1.16, 1.33) | 0.21             | 0.29          | 0.72 (0.66, 0.80) |
| February 2021  | 0.54                        | 0.58          | 0.93 (0.87, 0.99) | 0.7              | 0.73          | 0.96 (0.95, 0.98) | 0.05                        | 0.11          | 0.46 (0.42, 0.49) | 0.18             | 0.29          | 0.63 (0.57, 0.70) |
| March 2021     | 0.6                         | 0.57          | 1.05 (0.98, 1.12) | 0.9              | 0.73          | 1.24 (1.22, 1.26) | 0.1                         | 0.11          | 0.92 (0.85, 0.99) | 0.17             | 0.29          | 0.58 (0.52, 0.64) |
| April 2021     | 0.7                         | 0.57          | 1.23 (1.14, 1.31) | 0.94             | 0.73          | 1.29 (1.27, 1.31) | 0.18                        | 0.11          | 1.62 (1.50, 1.74) | 0.23             | 0.29          | 0.80 (0.72, 0.89) |
| May 2021       | 0.57                        | 0.57          | 0.99 (0.92, 1.07) | 0.67             | 0.73          | 0.92 (0.91, 0.94) | 0.12                        | 0.11          | 1.05 (0.97, 1.13) | 0.12             | 0.3           | 0.40 (0.36, 0.44) |
| June 2021      | 0.6                         | 0.57          | 1.05 (0.98, 1.13) | 0.47             | 0.72          | 0.65 (0.64, 0.66) | 0.2                         | 0.11          | 1.76 (1.63, 1.90) | 0.2              | 0.3           | 0.66 (0.59, 0.74) |
| July 2021      | 0.7                         | 0.57          | 1.23 (1.14, 1.33) | 0.44             | 0.72          | 0.60 (0.59, 0.61) | 0.09                        | 0.11          | 0.83 (0.76, 0.90) | 0.25             | 0.3           | 0.83 (0.74, 0.93) |
| August 2021    | 0.64                        | 0.57          | 1.12 (1.03, 1.21) | 0.57             | 0.72          | 0.79 (0.78, 0.81) | 0.18                        | 0.11          | 1.67 (1.54, 1.81) | 0.2              | 0.3           | 0.65 (0.58, 0.73) |

|                |      |      |                   |      |      |                   |      |      |                   |      |      |                   |
|----------------|------|------|-------------------|------|------|-------------------|------|------|-------------------|------|------|-------------------|
| September 2021 | 0.54 | 0.57 | 0.94 (0.87, 1.02) | 0.74 | 0.72 | 1.02 (1.00, 1.04) | 0.14 | 0.11 | 1.32 (1.21, 1.44) | 0.26 | 0.3  | 0.86 (0.76, 0.98) |
| October 2021   | 0.9  | 0.57 | 1.59 (1.46, 1.73) | 0.84 | 0.72 | 1.17 (1.14, 1.19) | 0.1  | 0.11 | 0.97 (0.89, 1.05) | 0.25 | 0.3  | 0.81 (0.72, 0.93) |
| November 2021  | 0.6  | 0.57 | 1.06 (0.98, 1.16) | 0.77 | 0.72 | 1.08 (1.05, 1.10) | 0.13 | 0.11 | 1.22 (1.11, 1.33) | 0.18 | 0.31 | 0.60 (0.52, 0.68) |
| December 2021  | 0.8  | 0.57 | 1.42 (1.30, 1.55) | 1.04 | 0.71 | 1.45 (1.42, 1.48) | 0.08 | 0.11 | 0.74 (0.67, 0.81) | 0.23 | 0.31 | 0.76 (0.67, 0.87) |
| January 2022   | 0.43 | 0.56 | 0.75 (0.69, 0.83) | 0.39 | 0.71 | 0.55 (0.54, 0.57) | 0.17 | 0.11 | 1.58 (1.44, 1.74) | 0.23 | 0.31 | 0.75 (0.65, 0.86) |
| February 2022  | 0.49 | 0.56 | 0.87 (0.80, 0.96) | 0.49 | 0.71 | 0.69 (0.68, 0.71) | 0.21 | 0.1  | 1.96 (1.78, 2.16) | 0.18 | 0.31 | 0.58 (0.50, 0.66) |
| March 2022     | 0.85 | 0.56 | 1.51 (1.38, 1.66) | 0.95 | 0.71 | 1.34 (1.31, 1.37) | 0.15 | 0.1  | 1.48 (1.35, 1.64) | 0.24 | 0.31 | 0.78 (0.68, 0.90) |
| April 2022     | 0.75 | 0.56 | 1.34 (1.22, 1.48) | 0.49 | 0.71 | 0.70 (0.68, 0.71) | 0.1  | 0.1  | 1.00 (0.90, 1.10) | 0.24 | 0.31 | 0.77 (0.67, 0.90) |
| May 2022       | 0.49 | 0.56 | 0.88 (0.79, 0.97) | 0.66 | 0.71 | 0.93 (0.91, 0.95) | 0.15 | 0.1  | 1.51 (1.36, 1.67) | 0.31 | 0.32 | 0.97 (0.84, 1.13) |
| June 2022      | 0.72 | 0.56 | 1.29 (1.16, 1.42) | 0.72 | 0.7  | 1.03 (1.00, 1.05) | 0.21 | 0.1  | 2.02 (1.82, 2.25) | 0.13 | 0.32 | 0.40 (0.35, 0.47) |
| July 2022      | 0.95 | 0.56 | 1.70 (1.53, 1.88) | 0.36 | 0.7  | 0.51 (0.50, 0.53) | 0.18 | 0.1  | 1.78 (1.60, 1.99) | 0.14 | 0.32 | 0.44 (0.38, 0.52) |
| August 2022    | 0.49 | 0.56 | 0.88 (0.79, 0.98) | 0.66 | 0.7  | 0.94 (0.91, 0.96) | 0.17 | 0.1  | 1.67 (1.50, 1.86) | 0.19 | 0.32 | 0.60 (0.51, 0.70) |

Abbreviations: RR = relative rate; CI = confidence interval
